# Supplementary material for: ‘Sadly I think we are sort of still quite white, middle-class really’ – Inequities in access to bereavement support: Findings from a mixed methods study
Source: PubMed Central journal article supplement (PMC10074747; doi:10.1177/02692163221133665), 2022-11-06
Supplement: sj-pdf-3-pmj-10.1177_02692163221133665.pdf [file sj-pdf-3-pmj-10.1177_02692163221133665.pdf]

**Table I. Results of logistic regression for there being specific community groups with unmet bereavement support needs not being reached/experiencing barriers to accessing your service (yes or no)**

|                                  | Full model |          |        |       |          | Reduced Model |          |        |       |          |
|----------------------------------|------------|----------|--------|-------|----------|---------------|----------|--------|-------|----------|
|                                  | Df         | Deviance | AIC    | LRT   | Pr(>Chi) | Df            | Deviance | AIC    | LRT   | Pr(>Chi) |
| Intercept                        | 157.84     | 197.84   |        |       |          | 184.66        | 188.66   |        |       |          |
| Catchment area                   | 3          | 158.98   | 192.98 | 1.143 | 0.767    |               |          |        |       |          |
| Organisation type                | 6          | 163.13   | 191.13 | 5.297 | 0.506    |               |          |        |       |          |
| Focus on children & young people | 1          | 157.84   | 195.84 | 0.009 | 0.926    |               |          |        |       |          |
| Focus on adults                  | 1          | 158      | 196    | 0.161 | 0.688    |               |          |        |       |          |
| Focus on other age groups        | 1          | 157.86   | 195.86 | 0.027 | 0.869    |               |          |        |       |          |
| Restricted to specific groups    | 1          | 158.4    | 196.4  | 0.563 | 0.453    | 1             | 185.72   | 187.72 | 1.063 | 0.303    |
| Specialise in age of deceased    | 1          | 158.83   | 196.83 | 0.996 | 0.318    |               |          |        |       |          |
| Support for all causes of death  | 1          | 159.16   | 197.16 | 1.32  | 0.251    |               |          |        |       |          |
| Number of clients                | 4          | 163.97   | 195.97 | 6.136 | 0.189    |               |          |        |       |          |

**Table II. Results of logistic regression for proportion of clients from minoritised ethnic groups (<5% or ≥5%)**

|                                  | Full Model: |          |        |       |          | Reduced Model: |          |        |       |          |
|----------------------------------|-------------|----------|--------|-------|----------|----------------|----------|--------|-------|----------|
|                                  | Df          | Deviance | AIC    | LRT   | Pr(>Chi) | Df             | Deviance | AIC    | LRT   | Pr(>Chi) |
| Intercept                        | 109.05      | 149.04   |        |       |          | 120.81         | 132.81   |        |       |          |
| Catchment area                   | 3           | 110.29   | 144.29 | 1.244 | 0.743    |                |          |        |       |          |
| Organisation type                | 6           | 115.95   | 143.95 | 6.905 | 0.330    |                |          |        |       |          |
| Focus on children & young people | 1           | 110.92   | 148.92 | 1.879 | 0.171    | 1              | 124.29   | 134.29 | 3.479 | 0.062    |
| Focus on adults                  | 1           | 110.27   | 148.27 | 1.225 | 0.268    |                |          |        |       |          |
| Focus on other age groups        | 1           | 109.36   | 147.36 | 0.315 | 0.575    |                |          |        |       |          |
| Restricted to specific groups    | 1           | 109.33   | 147.33 | 0.284 | 0.594    |                |          |        |       |          |
| Specialise in age of deceased    | 1           | 109.07   | 147.07 | 0.022 | 0.883    |                |          |        |       |          |
| Support for all causes of death  | 1           | 109.13   | 147.13 | 0.086 | 0.770    |                |          |        |       |          |
| Number of clients                | 4           | 115.51   | 147.51 | 6.468 | 0.167    | 4              | 130.52   | 134.52 | 9.701 | 0.046    |

**Table III. Results of logistic regression for collection of ethnicity data (yes/no)**

|                                  | Full Model: |          |        |        |          | Reduced Model: |          |        |       |          |
|----------------------------------|-------------|----------|--------|--------|----------|----------------|----------|--------|-------|----------|
|                                  | Df          | Deviance | AIC    | LRT    | Pr(>Chi) | Df             | Deviance | AIC    | LRT   | Pr(>Chi) |
| Intercept                        | 153.38      | 193.38   |        |        |          | 192.23         | 196.23   |        |       |          |
| Catchment area                   | 3           | 157.97   | 191.97 | 4.5914 | 0.20428  |                |          |        |       |          |
| Organisation type                | 6           | 162.41   | 190.41 | 9.033  | 0.17173  |                |          |        |       |          |
| Focus on children & young people | 1           | 156.17   | 194.17 | 2.7919 | 0.09474  | 1              | 195.37   | 197.37 | 3.145 | 0.077    |
| Focus on adults                  | 1           | 154.54   | 192.54 | 1.1628 | 0.28088  |                |          |        |       |          |
| Focus on other age groups        | 1           | 153.96   | 191.96 | 0.5829 | 0.44519  |                |          |        |       |          |
| Restricted to specific groups    | 1           | 155.33   | 193.33 | 1.9448 | 0.16315  |                |          |        |       |          |
| Specialise in age of deceased    | 1           | 153.68   | 191.68 | 0.2979 | 0.5852   |                |          |        |       |          |
| Support for all causes of death  | 1           | 153.77   | 191.77 | 0.3898 | 0.5324   |                |          |        |       |          |
| Number of clients                | 4           | 159.46   | 191.46 | 6.0754 | 0.19359  |                |          |        |       |          |
